# Supplementary material
Source: ML conference proceedings conference paper supplement (https://proceedings.neurips.cc/paper_files/paper/2018/hash/210f760a89db30aa72ca258a3483cc7f-Abstract.html)
Supplement: Supplementary file 1 [file 210f760a89db30aa72ca258a3483cc7f-Supplemental.zip]

## A Proof of Theorem 1

**Proof.** In order to prove Thm. 1, we first need the following proposition about the confidence intervals used in computing the optimistic reward  $\tilde{r}(s, a)$ .

**Proposition 2.** *Let assume  $\|\theta_a^*\|_2 \leq B$ . If  $\hat{\theta}_{t,a}$  is computed as in Eq. 4 and  $c_{t,a}$  is defined as in Eq. 6, then*

$$\mathbb{P}\left(r(s, a) \leq \hat{r}(s, a) + c_{t,a}\|x_{s,a}\|_{V_{t,a}^{-1}}\right) \leq \frac{t^{-\alpha}}{K}.$$

*Proof.* By definition of  $\rho(s, a)$  we have  $0 \leq \rho(s, a) \leq \sum_{\tau=1}^w \frac{1}{\tau} < \log(w) + 1 \doteq \ell_w$ . Thus  $1 \leq \|x_{s,a}\|_2^2 \leq \sum_{j=0}^d \ell_w^j = \frac{1-\ell_w^{d+1}}{1-\ell_w} = L_w^2$ . Using Thm. 2 of [1], we have with probability  $1 - \delta$ ,

$$\|\hat{\theta}_{t,a} - \theta_a^*\|_{V_{t,a}} \leq R\sqrt{(d+1)\log\left(\frac{1+T_{t,a}L_w^2/\lambda}{\delta}\right)} + \lambda^{1/2}B.$$

Thus for all  $s \in S$  we have,

$$|r(s, a) - \hat{r}(s, a)| = |x_{s,a}^\top \hat{\theta}_{t,a} - x_{s,a}^\top \theta_a^*| \leq \|x_{s,a}\|_{V_{t,a}^{-1}} \|\hat{\theta}_{t,a} - \theta_a^*\|_{V_{t,a}}.$$

Using  $\delta = \frac{t^{-\alpha}}{K}$  concludes the proof.  $\square$

An immediate result of Prop. 2 is that the estimated average reward of  $\tilde{\pi}_k$  in the optimistic MDP  $\widetilde{M}_k$  is an upper-confidence bound on the optimal average reward, i.e., for any  $t$  (the probability follows by a union bound over actions)

$$\mathbb{P}(\eta^* > \eta^{\tilde{\pi}_k}(\widetilde{M}_k)) \leq t^{-\alpha}. \quad (7)$$

We are now ready to prove the main result.

*Proof of Thm. 1.* We follow similar steps as in [9]. We split the regret over episodes as

$$\Delta(\mathcal{A}, T) = \sum_{k=1}^m \sum_{t=t_k}^{t_{k+1}-1} (\eta^* - r(s_t, a_t)) = \sum_{k=1}^m \Delta_k.$$

Let  $\mathcal{T}_{k,a} = \{t_k \leq t < t_{k+1} : a_t = a\}$  be the steps when action  $a$  is selected during episode  $k$ . We upper bound the per-episode regret as

$$\Delta_k = \sum_{a \in [K]} \sum_{t \in \mathcal{T}_{k,a}} (\eta^* - r(s_t, a)) \leq \sum_{t=t_k}^{t_{k+1}-1} (\tilde{\eta}_k - \tilde{r}_k(s_t, a)) + \sum_{a \in [K]} \sum_{t \in \mathcal{T}_{k,a}} (\tilde{r}_k(s_t, a) - r(s_t, a)),$$

where the inequality directly follows from the event that  $\tilde{\eta}_k \geq \eta^*$  (Eq. 7) with probability  $1 - T^{-\alpha}$ . Notice that the low-probability event of failing confidence intervals can be treated as in [9].

We proceed by bounding the first term of Eq. 8. Unlike in the general online learning scenario, in our setting the transition function  $f$  is known and thus the regret incurred from bad estimates of the dynamics is reduced to zero. Furthermore, since we are dealing with deterministic MDPs, the optimal policy converges to a loop over states. When starting a new policy, we may start from a state outside its loop. Nonetheless, it is easy to verify that starting from any state  $s$ , it is always possible to reach any desired state  $s'$  in at most  $w$  steps (i.e., the size of the history window). As a result, within each episode  $k$  the difference between the cumulative reward ( $\sum_t \tilde{r}_k(s_t, a)$ ) and the (optimistic) average reward  $((t_{k+1} - t_k)\tilde{\eta}_k)$  in the loop never exceeds  $w$ . Furthermore, since episodes terminate when one action doubles its number of samples, using a similar proof as [9], we have that the number of episodes is bounded as  $m \leq K \log_2(\frac{8T}{K})$ . As a result, the contribution of the first term of Eq. 8 to the overall regret is bounded as

$$\sum_{k=1}^m \sum_{t=t_k}^{t_{k+1}-1} (\tilde{\eta}_k - \tilde{r}_k(s_t, a)) \leq Kw \log_2\left(\frac{8T}{K}\right). \quad (8)$$

The second term in Eq. 8 refers to the (cumulative) reward estimation error and it can be decomposed as

$$|\tilde{r}_k(s_t, a) - r(s_t, a)| \leq |\tilde{r}_k(s_t, a) - \hat{r}_k(s_t, a)| + |\hat{r}_k(s_t, a) - r(s_t, a)|.$$

We can bound the cumulative sum of the second term as (similar for the first, since  $\tilde{r}_k$  belongs to the confidence interval of  $\hat{r}_k$  by construction)

$$\begin{aligned} \sum_{k=1}^m \sum_{a \in [K]} \sum_{t \in \mathcal{T}_{k,a}} |\hat{r}_k(s_t, a) - r(s_t, a)| &\leq \sum_{k=1}^m \sum_{a \in [K]} \sum_{t \in \mathcal{T}_{k,a}} c_{t,a} \|x_{s_t,a}\|_{V_{a,t}^{-1}} \\ &\leq c_{\max} \sum_{a \in [K]} \sqrt{\sum_{k=1}^m \sum_{t \in \mathcal{T}_{k,a}} \|x_{s_t,a}\|_{V_{a,t}^{-1}}^2} \sqrt{T_a}, \end{aligned}$$

where the first inequality follows from Prop. 2 with probability  $1 - T^{-\alpha}$ , and  $T_a$  is the total number of times  $a$  has been selected at step  $T$ . Let  $\mathcal{T}_a = \cup_k \mathcal{T}_{k,a}$ , then using Lemma 11 of [1], we have

$$\sum_{t \in \mathcal{T}_a} \|x_{s_t,a}\|_{V_{t,a}^{-1}}^2 \leq 2 \log \frac{\det(V_{T,a})}{\det(\lambda I)},$$

and by Lem. 10 of [1], we have

$$\det(V_{t,a}) \leq (\lambda + tL_w^2/(d+1))^{d+1},$$

which leads to

$$\begin{aligned} \sum_{k=1}^m \sum_{a \in [K]} \sum_{t \in \mathcal{T}_{k,a}} |\hat{r}_k(s_t, a) - r(s_t, a)| &\leq c_{\max} \sum_{a \in [K]} \sqrt{T_a} \sqrt{2(d+1) \log \left( \frac{\lambda + tL_w^2}{\lambda(d+1)} \right)} \\ &\leq c_{\max} \sqrt{2KT(d+1) \log \left( \frac{\lambda + tL_w^2}{\lambda(d+1)} \right)}. \end{aligned}$$

Bringing all the terms together gives the regret bound.  $\square$

## B Experiments Details

| Genre            | $\theta_{a,0}^*$ | $\theta_{a,1}^*$ | $\theta_{a,2}^*$ | $\theta_{a,3}^*$ | $\theta_{a,4}^*$ | $\theta_{a,5}^*$ |
|------------------|------------------|------------------|------------------|------------------|------------------|------------------|
| <i>Action</i>    | 3.1              | 0.54             | -1.08            | 0.78             | -0.22            | 0.02             |
| <i>Comedy</i>    | 3.34             | 0.54             | -1.08            | 0.78             | -0.22            | 0.02             |
| <i>Adventure</i> | 3.51             | 0.86             | -2.7             | 3.06             | -1.46            | 0.24             |
| <i>Thriller</i>  | 3.4              | 1.26             | -2.9             | 2.76             | -1.14            | 0.16             |
| <i>Drama</i>     | 2.75             | 1.0              | 0.94             | -1.86            | 0.94             | -0.16            |
| <i>Children</i>  | 3.52             | 0.1              | 0.0              | -0.3             | 0.2              | -0.04            |
| <i>Crime</i>     | 3.37             | 0.32             | 1.12             | -3.0             | 2.26             | -0.54            |
| <i>Horror</i>    | 3.54             | -0.68            | 1.84             | -2.04            | 0.82             | -0.12            |
| <i>SciFi</i>     | 3.3              | 0.64             | -1.32            | 1.1              | -0.38            | 0.02             |
| <i>Animation</i> | 3.4              | 1.38             | -3.44            | 3.62             | -1.62            | 0.24             |

Table 3: Reward parameters of each genre for the *movielens* experiment.

The parameters used in the MovieLens experiment are reported in Table 3.
